1                    **Understanding properties of the master effector of phage shock operon in**  
2                    ***Mycobacterium tuberculosis* via bioinformatics approach**

3                    **Zarrin Basharat\*, Azra Yasmin**

4    Microbiology & Biotechnology Research Lab, Department of Environmental Sciences,  
5    Fatima Jinnah Women University, 46000, Pakistan.

6    **\*Corresponding author email:** zarrin.iiui@gmail.com

7    **Keywords:** *Mycobacterium tuberculosis*, Phage shock protein, Structure modeling,  
8    Dynamics simulation.

9

10

11

12

13

14

15

16

17    **NOTE:** An expanded version of this manuscript is under-preparation. The current pre-print  
18    version (v.01) of this manuscript may contain grammatical & proofreading mistakes. Errors  
19    and omissions excepted.

20

# 1    **Abstract**

2    The phage-shock-protein (psp) is a part of the psp operon, which assists in safeguarding the  
3    survival of bacterium in stress and shields the cell against proton motif force challenge. It is  
4    strongly induced by bacterium allied phages, improperly localized mutant porins and various  
5    other stresses. Master effector of the operon, PspA has been modeled and simulated,  
6    illustrating how it undergoes significant conformational transition at the far end in  
7    *Mycobacterium tuberculosis*. Association of this key protein of the operon influences action  
8    of Psp system on the whole. We are further working on the impact of phosphorylation  
9    perturbation and the impact of structural fluctuations during complex formation of PspA with  
10   other moieties of interest.

11

12

13

14

15

16

17

18

19

20

1 We hereby report *ab initio* structure model of the *Mycobacterium tuberculosis* phage shock  
 2 protein A (PspA). PspA is the central constituent of bacterial stress response machinery,  
 3 encoded by phage shock operon (Huvet et al., 2010). PspA, regulates not only it's own  
 4 transcription but that of the whole operon as well (Elderkin et al., 2005; Male et al., 2014).  
 5 PspA is inferred to be a dual-function protein (Guegwen et al., 2009; Jovanovic et al., 2014)  
 6 and localized amid cytoplasmic and inner membrane interface of the bacterium (Engl et al.,  
 7 2009). It is responsible for maintaining the cell membrane integrity along with restoration of  
 8 the proton motive force (Male et al., 2014; Engl et al., 2009; Wan et al., 2015).

9 *Mycobacterium tuberculosis* is a pathogenic bacterium responsible for causing disease in  
 10 humans and veterinary species (Sakamoto, 2012). A lot of work has been carried out on  
 11 *Mycobacterium* phages for therapeutic purpose. However, to the best of our knowledge, no  
 12 report of the phage shock protein analysis for this pathogen exists at the moment. We  
 13 retrieved PspA protein sequence of *Mycobacterium tuberculosis* from the Uniprot database  
 14 with Accession number: R4M912 and analyzed the sequence and the structure using  
 15 computational tools. Although, PspA belongs to the highly conserved PspA/IM30 family but  
 16 *Mycobacterium tuberculosis* PspA shared a very low sequence homology with *Escherichia*  
 17 *coli* PspA, revealed using Clustal Omega (Fig. 1) with seeded guide trees and HMM profile-  
 18 profile technique for alignment generation at the backend (Sievers et al., 2011). The  
 19 secondary structure analyzed by PROMOTIF tool (Hutchison and Thornton, 1996) revealed  
 20 that the protein consisted of 9 helices, 6 helix-helix interactions, 14  $\beta$ -turns and 3  $\alpha$ -turns (Fig.  
 21 2A).

22 Due to low homology with experimentally determined structures available in the RCSB  
 23 Protein databank, 3D structure (Fig. 2B) was modeled by I-TASSER (Roy et al., 2010; yang  
 24 et al., 2015) using *Escherichia coli* PspA as a template (PDB ID: 4WHE). The C-score based  
 25 on the significance of template alignment threading and simulations of the structure assembly

1 convergence parameters of the model chosen for analysis was -1.29 (lies between ideal range  
2 of -5 to 2), indicating good quality model. Estimated root mean square deviation of the  
3 predicted model from the *Escherichia coli* model was  $7.8 \pm 4.4 \text{ \AA}$ . The constructed structure  
4 resembled a helical bundle with important binding site residues predicted to occur at position  
5 66, 69, 70, 73, 92, 96, 99, 100, 102 and 103. Despite low sequence conservation, the structure  
6 is however, well conserved due to the underlying fact that the protein folds remain conserved  
7 in similar function proteins. PspA structure in *Escherichia coli* is known to self-assemble into  
8 ring (Standar et al., 2008) or striated and indented rod-shaped complexes (Male et al., 2014)  
9 based on electron microscopy and helical rods based on X-ray crystallography analysis  
10 (Osadnik et al., 2015). PspA homologue LiaH in *Bacillus subtilis* (Wolf et al., 2008) and  
11 holins of bacteriophage lambda (Savva et al., 2010) have also been reported to self-assemble  
12 to rod-like structures from ring shaped protein complexes. The *Mycobacterium tuberculosis*  
13 PspA is also rod shaped and it is implied that these rod-like structures could form a support  
14 framework and aid in the maintenance of membrane integrity during phage shock response  
15 (Male et al., 2014).

16 CABS-flex procedure based on the well-established coarse-grained CABS protein model  
17 (Fraga et al., 2014) was employed for the fast simulation of near-native dynamics of PspA.  
18 CABS is a computationally efficient alternative to classical all-atom molecular dynamics  
19 (Jamroz et al., 2013). The 3D modeled structure was input and used as a starting point for the  
20 all-atom, explicit water, 10-nanosecond dynamic simulation. Analysis was carried out at the  
21 backend and automatically analyzed trajectory (Fig. 3) was obtained to study the dynamic  
22 behaviour of protein. A set of eight (all-atom) protein model sets were obtained with global  
23 distance test score ranging from 0.6-0.7. Most dominant structural fluctuations appeared at  
24 the last beta turn region including 8<sup>th</sup> and 9<sup>th</sup> helix. Relative propensity of protein residues to  
25 deviate from an average dynamics structure increased substantially at the ending helices with

1 fluctuation increasing from 100 Å at residue 160 to to >600 Å at residue 172. Understanding  
2 of flexibility of PspA can be of aid in research areas as molecular evolution (Boehr et al.,  
3 2009).

4 Phage infection has also been demonstrated to induce substantial fluctuations in host protein  
5 phosphorylation (Rieul et al., 1987; Russel and Model, 2006) and this was suggestive of  
6 PspA potential for phosphorylation as well. NetPhos Bac 1.0 (Miller et al., 2009) was used  
7 for prediction of possible phosphorylation residues. Seven serine residues (S144, S149, S156,  
8 S157, S158, S164, S166) were predicted to have phosphorylation potential based on neural  
9 network approach. However, none of these exhibited a knack to occur on predicted binding  
10 residues and hence, their exact role in PspA function of *Mycobacterium tuberculosis* yet  
11 remains to be elucidated.

12 Our findings pave way for further experimental studies and are of aid in understanding the  
13 *Mycobacterium tuberculosis* PspA response to the extracytoplasmic stresses that may damage  
14 the cytoplasmic membrane. We have used computational approach for the prediction of 3D  
15 structure of this protein but to furthur understand the function of the rod-like structure of  
16 *Mycobacterium tuberculosis* PspA, additional studies are required which can confirm and  
17 enhance the reported information along with elucidation of in depth biological function and  
18 interactions of *Mycobacterium tuberculosis* PspA.

19

20

21

22

23

## 1     **Figure Legends**

2     Figure 1. Multiple sequence alignment of the *Escherichia coli* and *Mycobacterium*  
3     *tuberculosis* PspA. Conserved residues are shown in red color. Helices are denoted by  
4     squiggles at the top of the alignment. Solvent accessibility is depicted by a bar below the  
5     sequence (blue = accessible, cyan = intermediate, white = buried).

6     Figure 2. (A) Secondary structure of *Mycobacterium tuberculosis* PspA (helices labelled H1,  
7     H2...H9).  $\beta$  depicts beta turn and  $\gamma$  is for gamma turn. (B) 3D structure of *Mycobacterium*  
8     *tuberculosis* PspA.

9     Figure 3. (A) Structural flexibility profile of simulated *Mycobacterium tuberculosis* PspA  
10     with fluctuations for individual protein residues shown via red line. The output is based on  
11     all-atom model via trajectory clustering. (B) Refinement of the model and superpositioning  
12     (Provided 3D model as base) is centred on maximum likelihood superposition method of  
13     THESEUS (Theobald and Wuttke, 2006).

14

15

16

## 17     **Competing interests**

18     The authors declare that no competing interests exist.

## 19     **Acknowledgements**

20     The authors are thankful to Dr. Alexandra Elbakyan for help with literature.

21

# References

1. Huvet, M., Toni, T., Sheng, X., Thorne, T., Jovanovic, G., Engl, C., Buck, M., Pinney, J.W. and Stumpf, M.P.H. (2010). The evolution of the Phage shock protein response system: Interplay between protein function, Genomic organization, and system function. *Mol. Biol. Evol.* 28, 1141-1155.
2. Elderkin, S., Bordes, P., Jones, S., Rappas, M. and Buck, M. (2005). Molecular determinants for PspA-mediated repression of the AAA transcriptional activator PspF. *J. Bacteriol.* 187, 3238–3248.
3. Male, A.L., Oyston, P.C.F. and Tavassoli, A. (2014). Self-Assembly of *Escherichia coli* Phage Shock Protein A. *Adv. Microbiol.* 4, 353-359.
4. Guegwen, E., Savitzky, D.C., Darwin, A.J. (2009). Analysis of the *Yersinia enterocolitica* PspBC proteins defines functional domains, essential amino acids and new roles within the phage-shock-protein response. *Mol. Microbiol.* 74, 619-633.
5. Jovanovic, G., Mehta, P. and Buck, M. (2014). Anionic lipids and the cytoskeletal proteins MreB and RodZ define the spatio-temporal distribution and function of membrane stress controller PspA in *Escherichia coli*. *Microbiology.* 160, 2374-86.
6. Engl, C., Jovanovic, G., Lloyd, L.J., Murray, H., Spitaler, M., Ying, L., Errington, J. and Buck, M. (2009). *In vivo* localizations of membrane stress controllers PspA and PspG in *Escherichia coli*. *Mol. Microbiol.* 73, 382-396.
7. Wan, F., Mao, Y., Dong, Y., Ju, L., Wu, G. and Gao, H. (2015). Impaired cell envelope resulting from *arcA* mutation largely accounts for enhanced sensitivity to hydrogen peroxide in *Shewanella oneidensis*. *Sci. Rep.* 5, 10228.
8. Sakamoto, K. (2012). The Pathology of *Mycobacterium tuberculosis* Infection. *Vet. Pathol.* 49, 423-439.

- 1        9. Sievers, F., Wilm, A., Dineen, D., Gibson, T. J., Karplus, K., Li, W., Lopez, R.,  
2        McWilliam, H., Remmert, M., Söding, J., Thompson, J.D. and Higgins, D.G. (2011).  
3        Fast, scalable generation of high-quality protein multiple sequence alignments using  
4        Clustal Omega. *Mol. Sys. Biol.* 7, 539.
- 5        10. Hutchison, E.G. and Thornton, J.M. (1996). PROMOTIF-a program to identify and  
6        analyze structural motifs in proteins. *Protein Sci.* 5, 212–220.
- 7        11. Roy, A., Kucukural, A. and Zhang, Y. (2010). I-TASSER: a unified platform for  
8        automated protein structure and function prediction. *Nat. Protoc.* 5, 725-738.
- 9        12. Yang, J., Yang, R., Roy, A., Xu, D., Poisson, J. and Zhang, Y. (2015). The I-TASSER  
10       Suite: protein structure and function prediction. *Nat. Methods.* 12, 7-8.
- 11       13. Standar, K., Mehner, D., Osadnik, H., Berthelmann, F., Hause, G., Lunsdorf, H. and  
12       Bruser, T. (2008). PspA Can Form Large Scaffolds in *Escherichia coli*. *FEBS Lett.*  
13       58, 3585-3589.
- 14       14. Osadnik, H., Schöpfel, M., Heidrich, E., Mehner, D., Lilie, H., Parthier, C., Risselada,  
15       H.J., Grubmüller, H., Stubbs, M.T. and Brüser, T. (2015). The PspF-binding domain  
16       PspA1-144 and the PspA-F complex-New insights into the coiled-coil dependent  
17       regulation of AAA+ proteins. *Mol. Microbiol.* In press. doi: 10.1111/mmi.13154.
- 18       15. Wolf, D., Kalamorz, F., Wecke, T., Juszczak, A., Mader, U., Homuth, G., Jordan, S.,  
19       Kirstein, J., Hoppert, M., Voigt, B., Hecker, M. and Mascher, T. In-depth profiling of  
20       the LiaR response of *Bacillus subtilis*. *J. Bacteriol.* 192, 4680-4693.
- 21       16. Savva, C.G., Dewey, J.S., Deaton, J., White, R.L., Struck, D.K., Holzeburg, A. and  
22       Young, R. (2008). The holin of bacteriophage Lambda forms rings with large  
23       diameter. *Mol. Microbiol.* 69, 784-793.



- 1        17. Rieul, C., Cortay, J.C., Bleicher, F. and Cozzone, A.J. (1987). Effect of bacteriophage  
2        M13 infection on phosphorylation of dnaK protein and other *Escherichia coli*  
3        proteins. Eur. J. Biochem. 168, 621-627.
- 4        18. Russel, M. and Model, P. (2006). Filamentous phage. In The Bacteriophages, R.L.  
5        Calendar, ed. (NY, USA: Oxford University Press), pp. 152-160.
- 6        19. Miller, M.L., Soufi, B., Jers, C., Blom, N., Macek, B. and Mijakovic, I. (2009).  
7        NetPhosBac-a predictor for Ser/Thr phosphorylation sites in bacterial proteins.  
8        Proteomics, 9, 116-125.
- 9        20. Theobald, D.L. and Wuttke, D.S. (2006). THESEUS: maximum likelihood  
10        superpositioning and analysis of macromolecular structures. Bioinformatics. 22,  
11        2171-2172.
- 12       21. Jamroz, M., Kolinski, A. and Kmiecik, S. (2013). CABS-flex: server for fast  
13       simulation of protein structure fluctuations. Nuc. Acids Res. 41, W427-W431.
- 14       22. Fraga, H., Grana-Montes, R., Illa, R., Covaleta, G. and Ventura, S. (2014).  
15       Association Between Foldability and Aggregation Propensity in Small Disulfide-Rich  
16       Proteins. Antioxid. Redox Signal. 21, 368-383.
- 17       23. Boehr, D.D., Nussinov, R. and Wright, P.E. (2009) The role of dynamic  
18       conformational ensembles in biomolecular recognition. Nat. Chem. Biol. 5, 789-796.
- 19
- 20
- 21

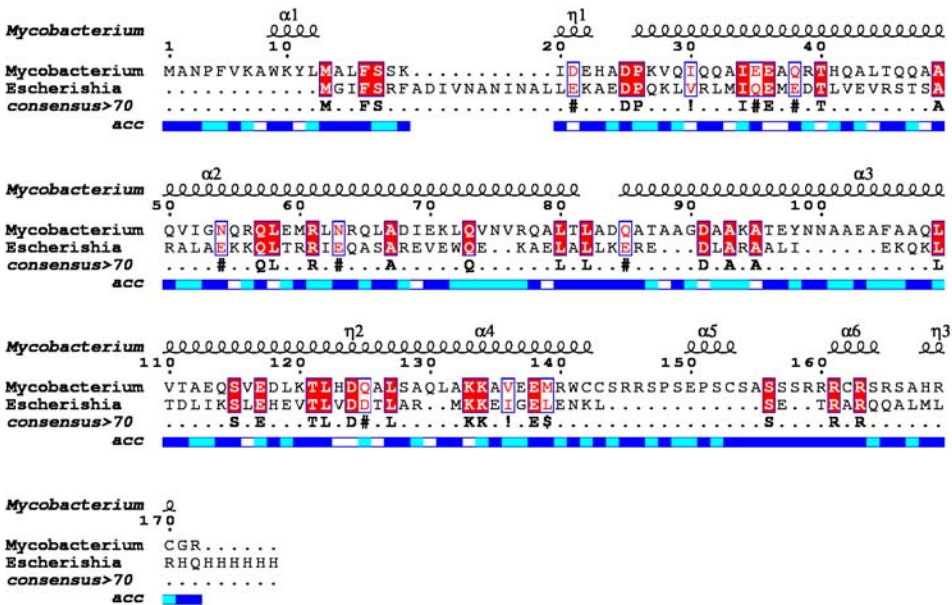

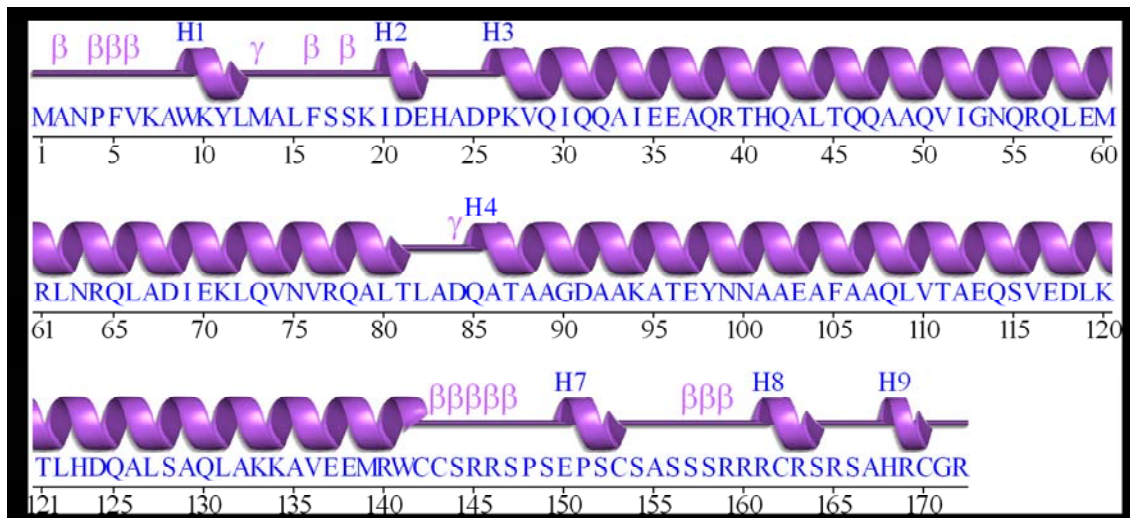

Fig 2A.

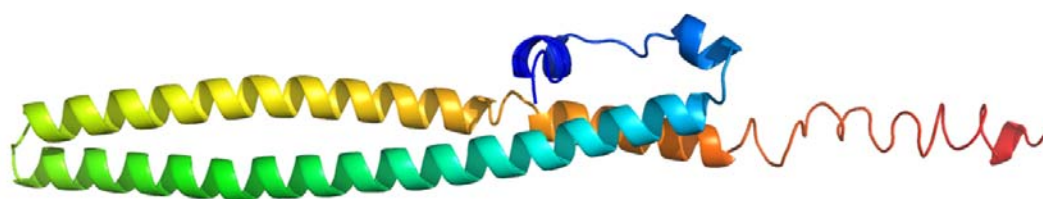

1

2 Fig 2B.

3

4

5

6

7

8

9

10

11

12

13

14

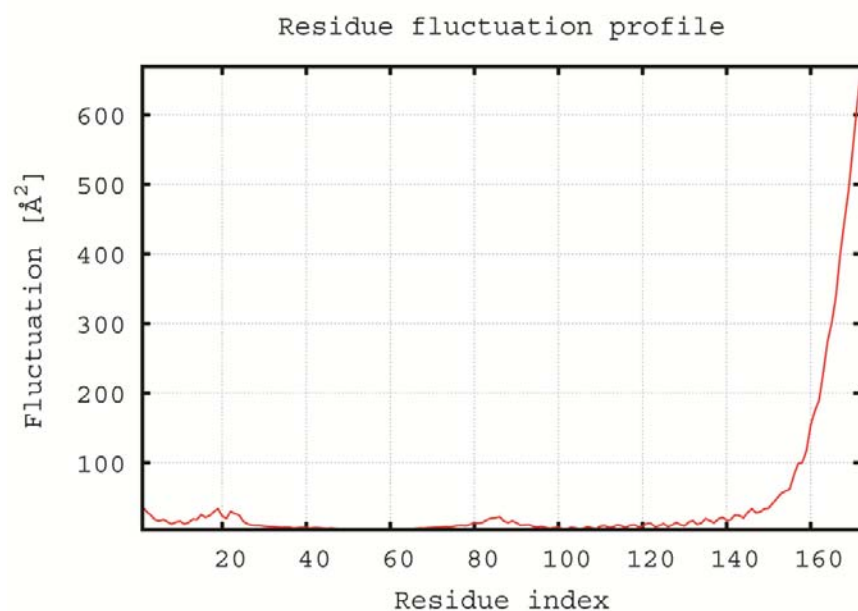

Fig 3A

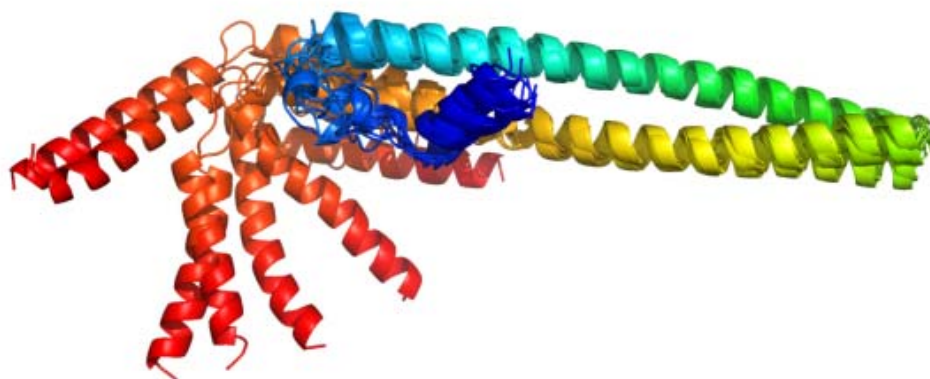

1

2 Fig 3B.

3

4
